# Supplementary material for: DNA or protein? Capillary zone electrophoresis–mass spectrometry rapidly elucidates metallodrug binding selectivity
Source: Royal Society of Chemistry journal article supplement (doi:10.1039/c7cc04582d), 2017-01-01
Supplement: c7cc04582d1.pdf [file c7cc04582d1.pdf]

Supplementary Information to

## DNA or Protein? Capillary Zone Electrophoresis–Mass Spectrometry Rapidly Elucidates Metallodrug Binding Selectivity

Christian Artner,<sup>a,b,c</sup> Hannah U. Holtkamp,<sup>c</sup> Wolfgang Kandioller,<sup>a</sup> Christian G. Hartinger,<sup>c</sup>  
Samuel M. Meier<sup>b,d</sup> and Bernhard K. Keppler<sup>a,b</sup>

## **Materials and Methods**

### ***Materials***

Chemicals (at least analytical grade), if not otherwise stated, were obtained from commercial suppliers and used as received. Ubiquitin (from bovine erythrocytes), [tri(acetylacetonato)cobalt(III)] (99.99% trace metals basis) and 3-nitrobenzyl alcohol (for mass spectrometry,  $\geq 99.5\%$ ) were purchased from Sigma-Aldrich, ammonium bicarbonate (BioUltra,  $\geq 99.5\%$ ), formic acid (p.a. for mass spectrometry) and ammonium hydroxide solution ( $\geq 25\%$  in H<sub>2</sub>O, eluent additive for LC-MS) from Fluka and acetic acid (99.8%, for analysis) from Acros. The lyophilized oligonucleotide 5'-dATTGGCAC-3' (HPLC purified) was obtained from Integrated DNA Technologies (Coralville, USA) or Microsynth (Balgach, Switzerland), and methanol and 2-propanol (both HPLC grade) from Fisher. NaOH solution (1 M) was purchased from Agilent Technologies and inorganic standards (P, Pt, Ru, Re;  $1000 \pm 3 \mu\text{g/mL}$ ) from CPI. Ultrapure water was obtained from a Millipore Advantage A10 system (18.2 M $\Omega$ ,  $\leq 5$  ppb TOC, 185 UV, Darmstadt, Germany). Cisplatin, RM175 and [(cym)RuCl(maltolato)], where cym =  $\eta^6$ -p-cymene, were synthesized according to literature procedures.<sup>1-3</sup>

### ***Instrumentation***

Measurements were performed on a G7100 capillary electrophoresis system (Agilent Technologies, Waldbronn, Germany) equipped with a diode-array detector (190–400 nm). High resolution mass spectra were acquired on an ESI-qTOF mass spectrometer (maXis 4G UHR-TOF, Bruker, Bremen, Germany) and ICP-MS data were acquired on an Agilent 7800 or 8800 (Waldbronn, Germany).

### ***Analyte Preparation***

Stock solutions of ubiquitin (ub), DNA-oligomer (DNA, 200  $\mu\text{M}$  each), and the metal complexes cisplatin, RM175 and [(cym)RuCl(maltolato)] (1 mM each) were prepared in water. Reaction solutions were prepared by adding the metallodrugs to the biomolecule mixture to yield final concentrations of 50  $\mu\text{M}$  for each ub/DNA and 200  $\mu\text{M}$  for the respective metallodrug. They were

incubated at 37 °C at constant shaking (400 rpm) in the dark. Aliquots were taken after 1 and 24 h of incubation.

### ***CZE-MS***

Capillaries (fused silica, undeactivated, 75  $\mu$ m, Agilent Technologies, USA) were cut to a total length of 70 cm with a Shortix™ capillary column cutter (SGT, Singapore) to obtain a clean edge. About 5 mm of the protective polyimide outer capillary coating was removed at both ends of the capillaries by flaming. The UV/Vis detection window was self-made 23 cm from the inlet end. The capillary was wiped clean with isopropanol before installation. New capillaries were flushed (950 mbar) successively with HCl (1 M, 5 min), water (1 min), NaOH (1 M, 10 min), water (1 min) and BGE (20 min) before use. The capillary cassette temperature was 25 °C. We used NH<sub>4</sub>HCO<sub>3</sub> (25 mM, pH 7.9) as background electrolyte (BGE). The separation voltage was 25 kV and capillaries were flushed with NaOH (1 M), water and BGE for 1 min each after each run. Typical instrument parameters can be found in Table S1.

**CZE-ESI-MS.** A coaxial sheath-flow CE-ESI-MS Sprayer Kit (Agilent Technologies) was used for CE hyphenation to the ESI mass spectrometer. The sheath liquid for ESI-MS experiments consisted of isopropanol, methanol, water, formic acid and 3-nitrobenzyl alcohol (25/25/50/0.2/0.5, v/v/v/v). The latter was added to obtain high charge states of the protein.<sup>4</sup> A syringe pump (KDS 1000, KD Scientific Inc., Holliston, USA) provided the sheath flow at 3  $\mu$ L/min. Typical instrument parameters can be found in Table S1. Before injection, the capillary was rinsed with BGE for 1 min (950 mbar). Samples were hydrodynamically injected for 5 s at 50 mbar. The electropherograms in the figures were obtained by selecting the appropriate mass-to-charge signal including an offset of  $\pm 0.05$  *m/z*.

**CZE-ESI-MS<sup>2</sup>.** In-source collision-induced dissociation (ISCID) energy was increased (90 – 170 eV) for top-down fragmentation experiments. All other parameters were similar to CZE-ESI-MS runs.

**CZE-ICP-MS.** A coaxial sheath-flow CE-ESI-MS Sprayer Kit (Agilent Technologies) was used for CE hyphenation to the ICP mass spectrometer in combination with a custom-built interface. The sheath liquid for ICP-MS experiments was 20 mM acetic acid containing 20 ppb Re as external standard and was provided by the nebulizer pump with an uptake of 0.03 rpm or 0.1 rpm. A solution

of [(triacetylacetonato)cobalt(III)] with a cobalt concentration of 50 mg/L was used as an internal standard that was diluted to a final concentration of 5 mg/L cobalt in the reaction mixtures. Typical instrument parameters can be found in Table S1. Before injection, the capillary was rinsed with BGE for 1 min (950 mbar). Samples were hydrodynamically injected for 10 s at 50 mbar. On the Agilent 7800 phosphorous was tracked as  $^{31}\text{P}$  (for cisplatin and RM175) and as  $^{47}\text{PO}$  on the 8800 ICP-MS (for [(cym)RuCl(maltolato)]). To lower the spectroscopic interferences for phosphorous an oxygen cell gas flow of 30% was applied.

### ***Data and statistical analysis***

ESI mass spectra data were analysed by ESI Compass 1.3 DataAnalysis 4.0 (Bruker Daltonics). Mass spectra of DNA and ubiquitin were deconvoluted by the maximum entropy deconvolution algorithm with automatic data-point spacing and an instrument resolving power of 30000. Data analysis was carried out with Microsoft Excel. The CZE-ICP-MS experiments were baseline subtracted by subtracting the average baseline signal between 0.5–2.0 min. Peak area was calculated by using trapezoid rule, and summation between peak valleys was obtained with the perpendicular drop method. Each experiment was carried out independently three times and these data sets were used for calculating standard deviations (SDs).

**Table S1** Typical instrument parameters

|                          |                                                                                                                           |
|--------------------------|---------------------------------------------------------------------------------------------------------------------------|
| <b>CE system</b>         | Agilent G7100                                                                                                             |
| Capillary                | fs capillary, i.d. 75 $\mu$ m, length 70 cm                                                                               |
| Background electrolyte   | 25 mM NH <sub>4</sub> HCO <sub>3</sub> , pH 7.9                                                                           |
| Separation Voltage       | 25 kV                                                                                                                     |
| Sample Injection         | Hydrodyn., ICP: 50 mbar, 10s<br>ESI: 50 mbar, 5s                                                                          |
| <b>ICP-MS system</b>     | Agilent 7800                                                                                                              |
| RF power                 | 1550 W                                                                                                                    |
| Sample depth             | 8 mm                                                                                                                      |
| Plasma gas               | 15 L/min                                                                                                                  |
| Carrier gas flow         | 1.05 L/min                                                                                                                |
| Auxiliary Gas            | 0.9 L/min                                                                                                                 |
| Monitored isotopes       | <sup>31</sup> P, <sup>59</sup> Co, <sup>185</sup> Re, <sup>195</sup> Pt or <sup>102</sup> Ru                              |
| Integration time [s]     | 0.2 ( <sup>31</sup> P), 0.1 ( <sup>59</sup> Co), 0.01 ( <sup>185</sup> Re), 0.1 ( <sup>195</sup> Pt or <sup>102</sup> Ru) |
| Measurement statistics   | 100 sweeps                                                                                                                |
| <b>ICP-MS system</b>     | Agilent 8800                                                                                                              |
| RF power                 | 1550 W                                                                                                                    |
| Sample depth             | 8 mm                                                                                                                      |
| Plasma gas               | 15 L/min                                                                                                                  |
| Carrier gas flow         | 1.30 L/min                                                                                                                |
| Monitored isotopes       | <sup>47</sup> PO, <sup>48</sup> SO, <sup>59</sup> Co, <sup>185</sup> Re, <sup>195</sup> Pt or <sup>102</sup> Ru           |
| Integration time [s]     | 0.2 ( <sup>47</sup> PO), 0.1 ( <sup>59</sup> Co), 0.1 ( <sup>185</sup> Re), 0.1 ( <sup>102</sup> Ru)                      |
| Measurement statistics   | 100 sweeps                                                                                                                |
| Cell gas flow            | 30% O <sub>2</sub>                                                                                                        |
| <b>ESI-MS system</b>     | Bruker maXis qTOF                                                                                                         |
| capillary voltage        | 4.5 kV                                                                                                                    |
| gas flow                 | 0.4 bar                                                                                                                   |
| dry gas                  | 4 L/min                                                                                                                   |
| dry heater               | 180 °C                                                                                                                    |
| quadrupole energy        | 4 eV                                                                                                                      |
| collision energy         | 8.0 eV                                                                                                                    |
| ion cooler transfer time | 70 $\mu$ s                                                                                                                |
| Spectra Rate             | 1 Hz                                                                                                                      |
| ISCID Energy             | 0 eV or 90 – 170 eV                                                                                                       |

**Table S2** Experimental ( $m_{\text{exp}}$ ) and theoretical ( $m_{\text{theor}}$ ) masses of the detected species during CZE–ESI–MS experiments. The mass error is given in parts per million ( $\Delta\text{ppm}$ ).

| compound                                                  | species                                                                                             | $m_{\text{exp}}$ | $m_{\text{theor}}$ | $\Delta\text{ppm}$ |
|-----------------------------------------------------------|-----------------------------------------------------------------------------------------------------|------------------|--------------------|--------------------|
| Cisplatin                                                 | $[\text{DNA} + 3\text{H}]^{3+}$                                                                     | 803.8227         | 803.8237           | 1.2                |
|                                                           | $[\text{DNA} + \text{Pt}(\text{NH}_3)_2 + \text{H}]^{3+}$                                           | 879.8235         | 879.8254           | 2.2                |
|                                                           | $[\text{DNA} + \text{Pt}(\text{NH}_3)_2\text{Cl} + 2\text{H}]^{3+}$                                 | 891.8143         | 891.8170           | 3.0                |
|                                                           | $[\text{DNA} + 2\text{Pt}(\text{NH}_3)_2 - \text{H}]^{3+}$                                          | 955.4902         | 955.4923           | 2.2                |
|                                                           | $[\text{DNA} + \text{Pt}(\text{NH}_3)_2 + \text{Pt}(\text{NH}_3)_2\text{Cl}]^{3+}$                  | 967.8155         | 967.8190           | 3.6                |
|                                                           | $[\text{DNA} + 2\{\text{Pt}(\text{NH}_3)_2\text{Cl}\} + \text{H}]^{3+}$                             | 979.8060         | 979.8096           | 3.7                |
|                                                           | $[\text{DNA} + 3\{\text{Pt}(\text{NH}_3)_2\} - 3\text{H}]^{3+}$                                     | 1031.1568        | 1031.1597          | 2.8                |
|                                                           | $[\text{DNA} + 2\{\text{Pt}(\text{NH}_3)_2\} + \text{Pt}(\text{NH}_3)_2\text{Cl} - 2\text{H}]^{3+}$ | 1043.4814        | 1043.4852          | 3.6                |
|                                                           | $[\text{ub} + 8\text{H}]^{8+}$                                                                      | 1071.4592        | 1071.4608          | 1.5                |
| $[\text{ub} + \text{Pt}(\text{NH}_3)_2 + 6\text{H}]^{8+}$ | 1099.9579                                                                                           | 1099.9613        | 3.1                |                    |
| RM175                                                     | $[(\text{bip})\text{Ru}(\text{en}) - \text{H}]^+$                                                   | 315.0434         | 315.0433           | 0.3                |
|                                                           | $[(\text{bip})\text{Ru}(\text{en})\text{Cl}]^+$                                                     | 351.0198         | 351.0197           | 0.3                |
|                                                           | $[\text{DNA} + 3\text{H}]^{3+}$                                                                     | 803.8187         | 803.8237           | 6.2                |
|                                                           | $[\text{DNA} + (\text{bip})\text{Ru}(\text{en}) - \text{H}]^{3+}$                                   | 908.4995         | 908.5032           | 4.1                |
|                                                           | $[\text{DNA} + 2\{(\text{bip})\text{Ru}(\text{en})\} - \text{H}]^{3+}$                              | 1013.1803        | 1013.1823          | 2.0                |
|                                                           | $[\text{ub} + 8\text{H}]^{8+}$                                                                      | 1071.4603        | 1071.4608          | 0.5                |
|                                                           | $[\text{ub} + (\text{bip})\text{Ru}(\text{en}) + 6\text{H}]^{8+}$                                   | 1110.7154        | 1110.7155          | 0.1                |
|                                                           | $[\text{DNA} + 3\{(\text{bip})\text{Ru}(\text{en})\} - 3\text{H}]^{3+}$                             | 1117.5243        | 1117.5278          | 3.1                |
|                                                           | $[2\text{DNA} + 4\{(\text{bip})\text{Ru}(\text{en})\} - 3\text{H}]^{5+}$                            | 1215.6161        | 1215.6176          | 1.2                |
| $[\text{DNA} + 3\text{H}]^{3+}$                           | 803.8187                                                                                            | 803.8237         | 6.2                |                    |
| [(cym)RuCl(maltolato)]                                    | $[(\text{cym})\text{Ru}(\text{maltolato})]^+$                                                       | 361.0382         | 361.0377           | 1.4                |
|                                                           | $[\text{ub} + (\text{cym})\text{Ru} + 6\text{H}]^{8+}$                                              | 1100.7147        | 1100.7108          | 3.5                |
|                                                           | $[\text{ub} + 8\text{H}]^{8+}$                                                                      | 1071.5908        | 1071.5861          | 4.4                |
|                                                           | $[\text{DNA} + 2\{(\text{cym})\text{Ru}\} - \text{H}]^{3+}$                                         | 959.8269         | 959.8239           | 3.1                |
|                                                           | $[\text{DNA} + 3\text{H}]^{3+}$                                                                     | 803.8274         | 803.8237           | 4.6                |

**Table S3** Experimental ( $m_{\text{exp}}$ ) and theoretical ( $m_{\text{theor}}$ ) masses of the selected cisplatin–biomolecule adducts during CZE–ESI-MS<sup>2</sup> experiments. Mass errors are given in parts per million ( $\Delta\text{ppm}$ ). Capital N is a nucleoside monophosphate, n is a nucleobase, HO-N is a nucleoside, and N-f is a nucleoside 3',5'-diphosphate methylene furane.

| compound                                                     | species                                                               | $m_{\text{exp}}$ | $m_{\text{theor}}$ | $\Delta\text{ppm}$ |
|--------------------------------------------------------------|-----------------------------------------------------------------------|------------------|--------------------|--------------------|
| ub + Pt(NH <sub>3</sub> ) <sub>2</sub>                       | [ <sup>1</sup> MQIF <sub>a</sub> <sup>4</sup> + Pt - 2H] <sup>+</sup> | 685.2149         | 685.2132           | 2.5                |
|                                                              | [ <sup>1</sup> MQIF <sub>b</sub> <sup>4</sup> + Pt - 2H] <sup>+</sup> | 713.2125         | 713.2081           | 6.2                |
| DNA + Pt(NH <sub>3</sub> ) <sub>2</sub>                      | [2g + Pt(NH <sub>3</sub> ) - H] <sup>+</sup>                          | 513.0793         | 513.0817           | 4.7                |
|                                                              | [G + Pt - H] <sup>+</sup>                                             | 523.0081         | 523.0090           | 1.7                |
|                                                              | [G + Pt(NH <sub>3</sub> ) - H] <sup>+</sup>                           | 540.0356         | 540.0355           | 0.2                |
|                                                              | [G-f + Pt(NH <sub>3</sub> ) <sub>2</sub> - H] <sup>+</sup>            | 735.0667         | 735.0652           | 2.0                |
|                                                              | [GG + Pt(NH <sub>3</sub> )] <sup>+</sup>                              | 869.0892         | 869.0881           | 1.3                |
|                                                              | [TG-f + Pt(NH <sub>3</sub> ) - H] <sup>+</sup>                        | 1022.086         | 1022.0848          | 1.2                |
|                                                              | [TTG-f + Pt(NH <sub>3</sub> ) - H] <sup>+</sup>                       | 1326.1279        | 1326.1309          | 2.3                |
|                                                              | [TTG-f + Pt(NH <sub>3</sub> ) <sub>2</sub> - H] <sup>+</sup>          | 1343.1517        | 1343.1574          | 4.2                |
|                                                              | [TTGG-f + Pt(NH <sub>3</sub> ) - H] <sup>+</sup>                      | 1655.1753        | 1655.1834          | 4.9                |
|                                                              | [TTGG-f + Pt(NH <sub>3</sub> ) <sub>2</sub> - H] <sup>+</sup>         | 1672.2055        | 1672.2099          | 2.6                |
| [HO-ATTGG-f + Pt(NH <sub>3</sub> ) - H] <sup>+</sup>         | 1888.2554                                                             | 1888.2750        | 10.4               |                    |
| DNA + Pt(NH <sub>3</sub> ) <sub>2</sub> Cl                   | [g + PtCl] <sup>+</sup>                                               | 381.9876         | 381.9823           | 13.9               |
|                                                              | [g + Pt(NH <sub>3</sub> )Cl] <sup>+</sup>                             | 399.0112         | 399.0089           | 5.8                |
|                                                              | [G-f + Pt(NH <sub>3</sub> ) - H] <sup>+</sup>                         | 718.0389         | 718.0387           | 0.3                |
|                                                              | [G-f + Pt(NH <sub>3</sub> )] <sup>+</sup>                             | 755.0161         | 755.0152           | 1.2                |
|                                                              | [G-f + Pt(NH <sub>3</sub> ) <sub>2</sub> Cl] <sup>+</sup>             | 772.0418         | 772.0418           | 0.0                |
|                                                              | [TTG-f + Pt(NH <sub>3</sub> ) <sub>2</sub> Cl] <sup>+</sup>           | 1380.1333        | 1380.1340          | 0.5                |
|                                                              | [HO-TTG-f + Pt(NH <sub>3</sub> ) <sub>2</sub> Cl] <sup>+</sup>        | 1613.2284        | 1613.2254          | 1.9                |
|                                                              | [TTGG-f + Pt(NH <sub>3</sub> )Cl] <sup>+</sup>                        | 1692.1596        | 1692.1601          | 0.3                |
| [TTGG-f + Pt(NH <sub>3</sub> ) <sub>2</sub> Cl] <sup>+</sup> | 1709.1821                                                             | 1709.1866        | 2.6                |                    |
| DNA + 2{Pt(NH <sub>3</sub> ) <sub>2</sub> }                  | [a + Pt(NH <sub>3</sub> ) - H] <sup>+</sup>                           | 346.0381         | 346.038            | 0.3                |
|                                                              | [g + Pt(NH <sub>3</sub> ) <sub>2</sub> - H] <sup>+</sup>              | 379.0596         | 379.0589           | 1.8                |
|                                                              | [A + Pt - H] <sup>+</sup>                                             | 507.0153         | 507.014            | 2.6                |
|                                                              | [2g + Pt(NH <sub>3</sub> ) - H] <sup>+</sup>                          | 513.0838         | 513.0817           | 4.1                |
|                                                              | [G + Pt - H] <sup>+</sup>                                             | 523.0095         | 523.0090           | 1.0                |
|                                                              | [G + Pt(NH <sub>3</sub> ) - H] <sup>+</sup>                           | 540.0403         | 540.0355           | 8.9                |
|                                                              | [GG + Pt(NH <sub>3</sub> )] <sup>+</sup>                              | 869.0846         | 869.0881           | 4.0                |
|                                                              | [DNA - C + 2Pt(NH <sub>3</sub> ) <sub>2</sub> - 2H] <sup>2+</sup>     | 1377.2163        | 1377.2131          | 2.3                |
|                                                              | [HO-ATTGGCA + 2Pt(NH <sub>3</sub> ) <sub>2</sub> - 2H] <sup>+</sup>   | 1328.1954        | 1328.1947          | 0.5                |
|                                                              | [TTGG-f + Pt(NH <sub>3</sub> ) - H] <sup>+</sup>                      | 1655.1949        | 1655.1834          | 6.9                |

**Table S3** Cont.

| compound                                     | species                                                                                     | $m_{\text{exp}}$ | $m_{\text{theor}}$ | $\Delta\text{ppm}$ |
|----------------------------------------------|---------------------------------------------------------------------------------------------|------------------|--------------------|--------------------|
| DNA + 3 {Pt(NH <sub>3</sub> ) <sub>2</sub> } | [a + Pt(NH <sub>3</sub> ) - H] <sup>+</sup>                                                 | 346.0376         | 346.038            | 1.2                |
|                                              | [g + Pt(NH <sub>3</sub> ) <sub>2</sub> - H] <sup>+</sup>                                    | 379.0560         | 379.0589           | 7.7                |
|                                              | [2g + Pt - H] <sup>+</sup>                                                                  | 496.0576         | 496.0557           | 3.8                |
|                                              | [A + Pt - H] <sup>+</sup>                                                                   | 507.0149         | 507.014            | 1.8                |
|                                              | [2g + Pt(NH <sub>3</sub> ) - H] <sup>+</sup>                                                | 513.0847         | 513.0817           | 5.8                |
|                                              | [G + Pt - H] <sup>+</sup>                                                                   | 523.0130         | 523.0090           | 7.6                |
|                                              | [G + Pt(NH <sub>3</sub> ) - H] <sup>+</sup>                                                 | 540.0429         | 540.0355           | 13.7               |
|                                              | [HO-ATTGGCA + 2Pt(NH <sub>3</sub> ) <sub>2</sub> + Pt(NH <sub>3</sub> ) - 4H] <sup>2+</sup> | 1433.1802        | 1433.1825          | 1.6                |

**Table S4** Experimental ( $m_{\text{exp}}$ ) and theoretical ( $m_{\text{theor}}$ ) masses of selected RM175–biomolecule adducts during CZE–ESI-MS<sup>2</sup> experiments. Mass errors are given in parts per million ( $\Delta\text{ppm}$ ) Capital N is a nucleoside monophosphate, n is a nucleobase, HO-N is a nucleoside, and N-f is a nucleoside 3',5'-disphosphate methylene furane.

| compound              | Species                                                  | $m_{\text{exp}}$ | $m_{\text{theor}}$ | $\Delta\text{ppm}$ |
|-----------------------|----------------------------------------------------------|------------------|--------------------|--------------------|
| DNA + (bip)Ru(en)     | [g + (bip)Ru - H] <sup>+</sup>                           | 406.0263         | 406.0241           | 5.4                |
| DNA + 2 {(bip)Ru(en)} | [(bip)Ru(en) - H] <sup>+</sup>                           | 315.0488         | 315.0433           | 17.5               |
|                       | [(bip)Ru + H <sub>2</sub> PO <sub>4</sub> ] <sup>+</sup> | 352.9588         | 352.9515           | 20.7               |
|                       | [c + (bip)Ru - H] <sup>+</sup>                           | 366.0238         | 366.0179           | 16.1               |
|                       | [t + (bip)Ru - H] <sup>+</sup>                           | 381.0236         | 381.0176           | 15.7               |
|                       | [a + (bip)Ru - H] <sup>+</sup>                           | 390.0345         | 390.0292           | 13.6               |
|                       | [g + (bip)Ru - H] <sup>+</sup>                           | 406.0279         | 406.0241           | 9.4                |
|                       | [AC + (bip)Ru - H] <sup>+</sup>                          | 875.0877         | 875.0896           | 2.2                |
|                       | [AC + (bip)Ru(en) - H] <sup>+</sup>                      | 935.1547         | 935.1584           | 4.0                |
|                       | [CAC + (bip)Ru - H] <sup>+</sup>                         | 1164.1365        | 1164.1363          | 0.2                |
|                       | [TTGGCAC + (bip)Ru] <sup>2+</sup>                        | 1215.6729        | 1215.6709          | 1.6                |
|                       | [CAC + (bip)Ru(en) - H] <sup>+</sup>                     | 1224.2172        | 1224.2051          | 9.9                |
|                       | [TTGGCAC + (bip)Ru(en)] <sup>2+</sup>                    | 1245.7034        | 1245.7053          | 1.5                |
|                       | [HO-ATT-f + (bip)Ru - H] <sup>+</sup>                    | 1274.1609        | 1274.1620          | 0.9                |
|                       | [DNA - c + (bip)Ru(en)] <sup>2+</sup>                    | 1306.7274        | 1306.7294          | 1.5                |
|                       | [HO-ATT-f + (bip)Ru(en) - H] <sup>+</sup>                | 1333.2236        | 1333.2230          | 0.5                |
|                       | [DNA + (bip)Ru(en)] <sup>2+</sup>                        | 1362.2491        | 1362.2511          | 1.5                |
|                       | [DNA - c + 2(bip)Ru - en - 2H] <sup>2+</sup>             | 1433.7099        | 1433.7137          | 2.7                |
|                       | [DNA - c + 2(bip)Ru(en) - 2H] <sup>2+</sup>              | 1463.7479        | 1463.7481          | 0.1                |
|                       | [GCAC + (bip)Ru - H] <sup>+</sup>                        | 1493.1880        | 1493.1891          | 0.7                |
|                       | [DNA + 2(bip)Ru(en) - 2H] <sup>2+</sup>                  | 1519.2702        | 1519.2697          | 0.3                |



Table S4 Cont.

| compound             | Species                                                  | $m_{\text{exp}}$ | $m_{\text{ex}}$ | $\Delta\text{ppm}$ |
|----------------------|----------------------------------------------------------|------------------|-----------------|--------------------|
| DNA + 2{(bip)Ru(en)} | [DNA + 2(bip)Ru(en) + Na - H] <sup>2+</sup>              | 1530.7589        | 1530.7646       | 3.7                |
|                      | [GCAC + (bip)Ru(en) - H] <sup>+</sup>                    | 1553.2536        | 1553.2579       | 2.8                |
|                      | [HO-ATTG-f + (bip)Ru - H] <sup>+</sup>                   | 1603.2136        | 1603.2148       | 0.7                |
|                      | [HO-ATTG-f + (bip)Ru(en) - H] <sup>+</sup>               | 1663.2836        | 1663.2836       | 0.0                |
|                      | [HO-ATTGG-f + (bip)Ru - H] <sup>+</sup>                  | 1932.2673        | 1932.2677       | 0.2                |
|                      | [HO-ATTGG-f + (bip)Ru(en) - H] <sup>+</sup>              | 1992.3356        | 1992.3365       | 0.5                |
| DNA + 3{(bip)Ru(en)} | [(bip)Ru(en) - H] <sup>+</sup>                           | 315.0499         | 315.0433        | 20.9               |
|                      | [(bip)Ru + H <sub>2</sub> PO <sub>4</sub> ] <sup>+</sup> | 352.9573         | 352.9515        | 16.4               |
|                      | [c + (bip)Ru - H] <sup>+</sup>                           | 366.0243         | 366.0179        | 17.5               |
|                      | [t + (bip)Ru - H] <sup>+</sup>                           | 381.0225         | 381.0176        | 12.9               |
|                      | [a + (bip)Ru - H] <sup>+</sup>                           | 390.0336         | 390.0292        | 11.3               |
|                      | [g + (bip)Ru - H] <sup>+</sup>                           | 406.0278         | 406.0241        | 9.1                |
|                      | [AC-OH + (bip)Ru - H] <sup>+</sup>                       | 875.0854         | 875.0896        | 4.8                |
|                      | [DNA - c + 3(bip)Ru(en) - 3H] <sup>3+</sup>              | 975.4967         | 975.4959        | 0.8                |
|                      | [DNA + (bip)Ru(en)] <sup>2+</sup>                        | 1362.2481        | 1362.2511       | 2.2                |
|                      | [DNA - c + 2(bip)Ru(en) - 2H] <sup>2+</sup>              | 1463.7465        | 1463.7481       | 1.1                |
|                      | [GCAC + (bip)Ru - H] <sup>+</sup>                        | 1493.1854        | 1493.1891       | 2.5                |
|                      | [DNA + 2(bip)Ru(en) - 2H] <sup>2+</sup>                  | 1519.2693        | 1519.2697       | 0.3                |
|                      | [GCAC + (bip)Ru(en) - H] <sup>+</sup>                    | 1553.2569        | 1553.2579       | 0.6                |
|                      | [HO-ATTG-f + (bip)Ru - H] <sup>+</sup>                   | 1603.2162        | 1603.2148       | 0.9                |
|                      | [HO-ATTG-f + (bip)Ru(en) - H] <sup>+</sup>               | 1663.2844        | 1663.2836       | 0.5                |
|                      | [HO-ATTGG-f + (bip)Ru - H] <sup>+</sup>                  | 1932.2660        | 1932.2677       | 0.9                |

**Figure S1** Experimental and simulated mass spectra of selected fragments of the DNA + Pt(NH<sub>3</sub>)<sub>2</sub>Cl mono-adduct depicting the additional isotopic pattern of chloride.

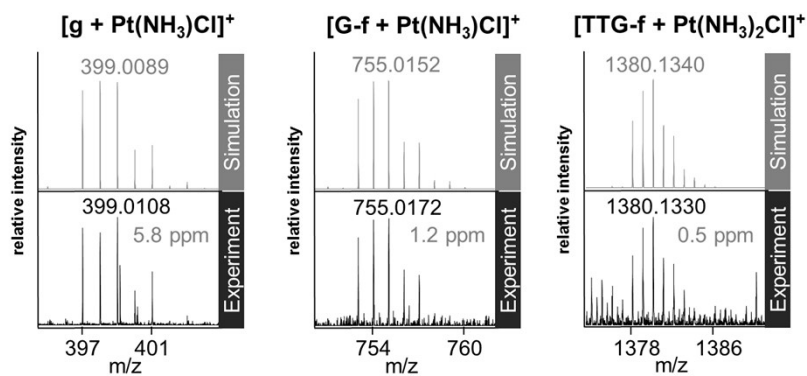

**Figure S2** Top-down mass spectrum of the ubiquitin-cisplatin mono-adduct ub + Pt(NH<sub>3</sub>)<sub>2</sub>.

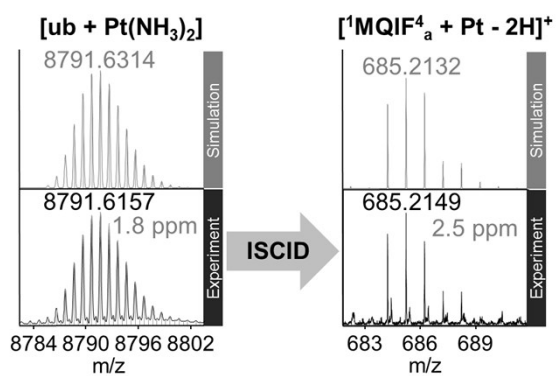

**Figure S3** Plot of the relative peak areas of the  $^{195}\text{Pt}$  and  $^{31}\text{P}$  traces ( $n = 3$ ) corresponding to selected species from the interaction between cisplatin and the oligonucleotide.

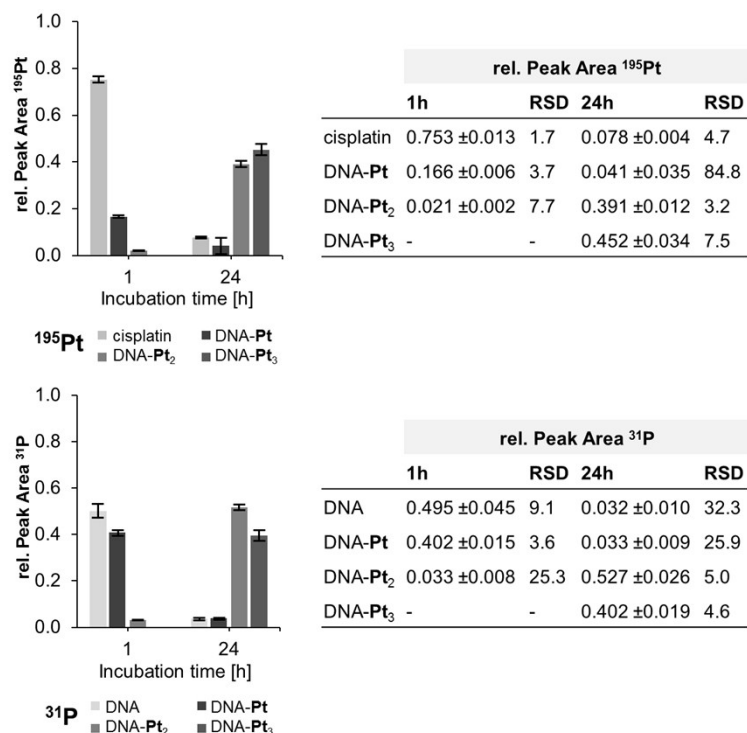

**Figure S4** Selected fragments from the top-down analysis of a reaction mixture containing RM175 and the oligonucleotide. The metallated adducts selected for top-down analysis correspond to DNA + 3{(bip)Ru(en)} (A) and DNA + {(bip)Ru(en)} (B).

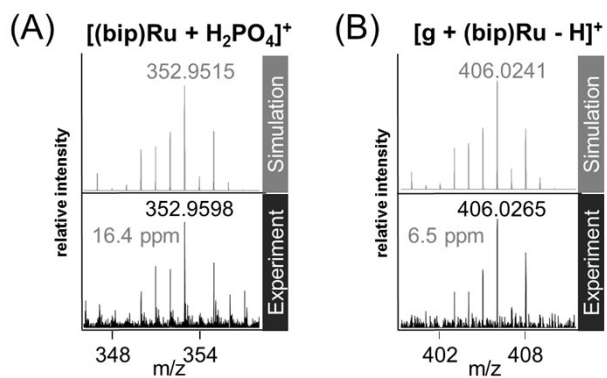

**Figure S5** Extracted ion electropherograms (EIEs) of the [(cym)RuCl(maltolato)]-biomolecule adducts by CZE-ESI-MS (A) and CZE-ICP-MS (B) after incubation with a mixture of oligonucleotide and protein (1:1) for 1 and 24 h.

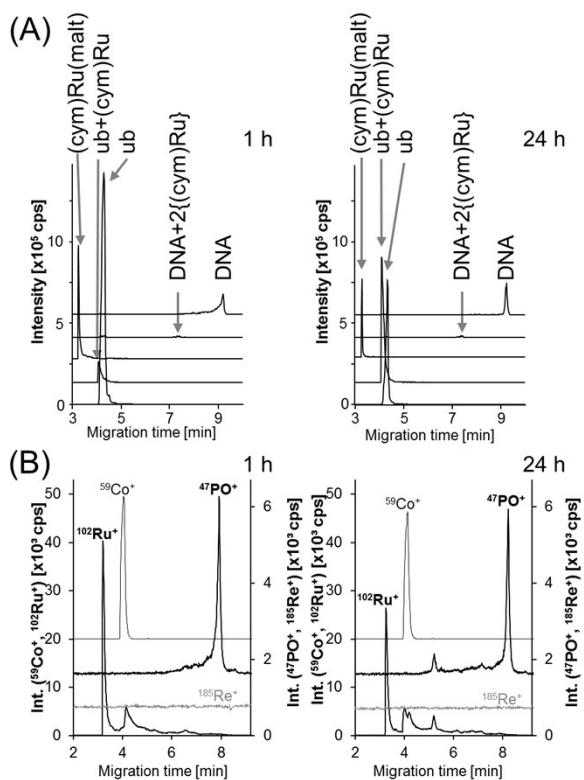

**Figure S6** Selected fragment from the top-down analysis of the ub + (cym)Ru adduct from the reaction identifying Met1 as the primary binding site of [(cym)RuCl(maltolato)] on ub.

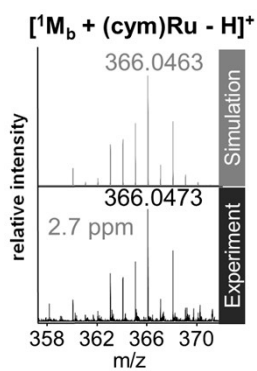

## References

1. S. C. Dhara, *Indian J. Chem., Sect. B*, 1970, 193-194.
2. R. E. Morris, R. E. Aird, P. del Socorro Murdoch, H. Chen, J. Cummings, N. D. Hughes, S. Parsons, A. Parkin, G. Boyd, D. I. Jodrell and P. J. Sadler, *J. Med. Chem.*, 2001, **44**, 3616-3621.
3. W. Kandioller, C. G. Hartinger, A. A. Nazarov, M. L. Kuznetsov, R. O. John, C. Bartel, M. A. Jakupec, V. B. Arion and B. K. Keppler, *Organometallics*, 2009, **28**, 4249-4251.
4. G. Bonvin, S. Rudaz and J. Schappler, *Anal. Chim. Acta*, 2014, **813**, 97-105.
